# Supplementary material for: The unique evolutionary pattern of the Hydroxyproline-rich glycoproteins superfamily in Chinese white pear (Pyrus bretschneideri)
Source: PubMed Central journal article supplement (PMC5816549; doi:10.1186/s12870-018-1252-2), 2018-02-17
Supplement: 12870_2018_1252_MOESM2_ESM.pdf [file 12870_2018_1252_MOESM2_ESM.pdf]

AGP peptides

Table of AGP peptides with accession numbers (e.g., AF032682) and amino acid sequences (e.g., MGGGIGIRALG...). Includes sub-sections for EXT-AGP and Lysine AGP.

Table of Lysine AGP peptides with accession numbers (e.g., AF032682) and amino acid sequences (e.g., AVAATGFF...).

Table of EXT peptides with accession numbers (e.g., AF032682) and amino acid sequences (e.g., TQDAFAKVMQ...).

Table of FRP peptides with accession numbers (e.g., AF032682) and amino acid sequences (e.g., MGGGIGIRALG...).

Table of AGP peptides (continued) with accession numbers (e.g., AF032682) and amino acid sequences (e.g., MGGGIGIRALG...).

Table of FLAs peptides with accession numbers (e.g., AF032682) and amino acid sequences (e.g., KGVLTIVV...).

Table of AGP peptides (continued) with accession numbers (e.g., AF032682) and amino acid sequences (e.g., MGGGIGIRALG...).

Table of AGP peptides (continued) with accession numbers (e.g., AF032682) and amino acid sequences (e.g., MGGGIGIRALG...).
