# Supplementary material for: The unique evolutionary pattern of the Hydroxyproline-rich glycoproteins superfamily in Chinese white pear (Pyrus bretschneideri)
Source: PubMed Central journal article supplement (PMC5816549; doi:10.1186/s12870-018-1252-2), 2018-02-17

Tree scale: 1

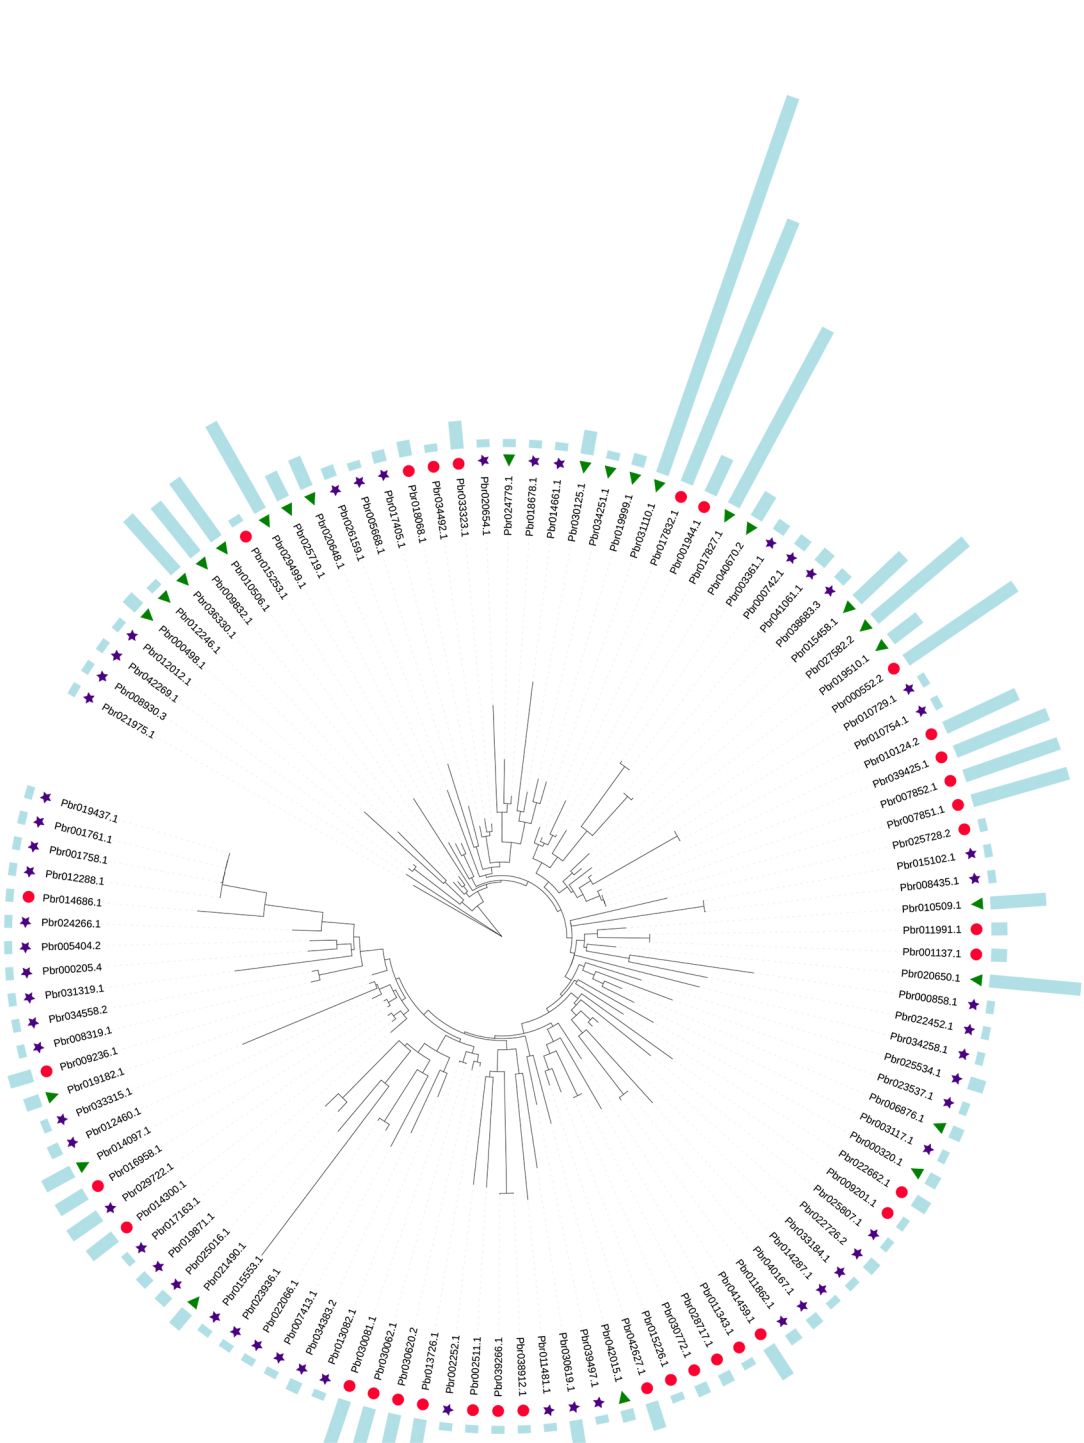

Supplement: 12870_2018_1252_MOESM3_ESM.pdf [file 12870_2018_1252_MOESM3_ESM.pdf]
