# Supplementary material for: The unique evolutionary pattern of the Hydroxyproline-rich glycoproteins superfamily in Chinese white pear (Pyrus bretschneideri)
Source: PubMed Central journal article supplement (PMC5816549; doi:10.1186/s12870-018-1252-2), 2018-02-17
Supplement: 12870_2018_1252_MOESM6_ESM.pdf [file 12870_2018_1252_MOESM6_ESM.pdf]

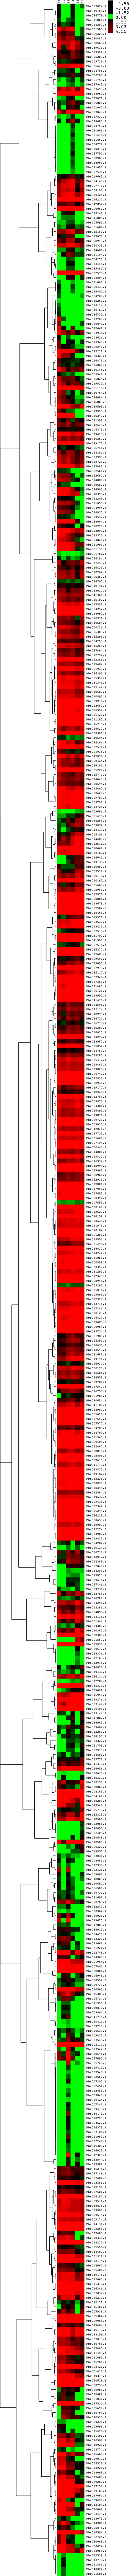

S1  
S2  
S3  
S4  
S5  
S6

Pbr033024.1  
Pbr040168.1  
Pbr024779.1  
Pbr019582.1  
Pbr001858.1  
Pbr001859.1  
Pbr005329.1  
Pbr030482.1  
Pbr030483.1  
Pbr039631.1  
Pbr039999.1  
Pbr052833.1  
Pbr009726.1  
Pbr026641.1  
Pbr004768.1  
Pbr002058.4  
Pbr007945.1  
Pbr023493.1  
Pbr028963.1  
Pbr037071.1  
Pbr025808.1  
Pbr001067.1  
Pbr023043.1  
Pbr017832.1  
Pbr028683.1  
Pbr030753.1  
Pbr032768.1  
Pbr019666.1  
Pbr021041.1  
Pbr018621.1  
Pbr004772.1  
Pbr039219.1  
Pbr037790.1  
Pbr020989.1  
Pbr018951.1  
Pbr021697.1  
Pbr007534.1  
Pbr019665.1  
Pbr034148.1  
Pbr007779.1  
Pbr008100.1  
Pbr030424.1  
Pbr016230.1  
Pbr042852.1  
Pbr000063.1  
Pbr038242.1  
Pbr018051.1  
Pbr003693.1  
Pbr021684.1  
Pbr015163.1  
Pbr017670.1  
Pbr008943.1  
Pbr014686.1  
Pbr011941.1  
Pbr004270.1  
Pbr033446.1  
Pbr035483.1  
Pbr032575.1  
Pbr008894.1  
Pbr021690.1  
Pbr008433.1  
Pbr025807.1  
Pbr004769.1  
Pbr035253.1  
Pbr018114.1  
Pbr040167.1  
Pbr036733.1  
Pbr013765.1  
Pbr026848.1  
Pbr022662.1  
Pbr023936.1  
Pbr008626.1  
Pbr013347.1  
Pbr006849.1  
Pbr025221.2  
Pbr020323.1  
Pbr026879.1  
Pbr026867.1  
Pbr010146.1  
Pbr005542.1  
Pbr036825.1  
Pbr019510.1  
Pbr031110.1  
Pbr010754.1  
Pbr020494.1  
Pbr016869.2  
Pbr039599.1  
Pbr019999.1  
Pbr016247.1  
Pbr041392.1  
Pbr042645.1  
Pbr004873.1  
Pbr019673.1  
Pbr012360.1  
Pbr029173.1  
Pbr006744.1  
Pbr032180.1  
Pbr023995.1  
Pbr028720.2  
Pbr027482.1  
Pbr002564.1  
Pbr033687.1  
Pbr014800.1  
Pbr039582.1  
Pbr024505.2  
Pbr018398.1  
Pbr023205.1  
Pbr021053.1  
Pbr004995.3  
Pbr034935.1  
Pbr039537.1  
Pbr038994.1  
Pbr010729.1  
Pbr023899.1  
Pbr032370.1  
Pbr024020.1  
Pbr011991.1  
Pbr001137.1  
Pbr001761.1  
Pbr026194.1  
Pbr017459.1  
Pbr016439.1  
Pbr023764.1  
Pbr025362.1  
Pbr034707.1  
Pbr018034.1  
Pbr033027.1  
Pbr041308.1  
Pbr015102.1  
Pbr017851.1  
Pbr034252.1  
Pbr014097.1  
Pbr010331.1  
Pbr040504.1  
Pbr000226.1  
Pbr035291.1  
Pbr004293.1  
Pbr016250.1  
Pbr025644.1  
Pbr012754.1  
Pbr023359.1  
Pbr015404.1  
Pbr001933.1  
Pbr026293.2  
Pbr035357.1  
Pbr031341.1  
Pbr025142.1  
Pbr010607.1  
Pbr010892.1  
Pbr029976.1  
Pbr042667.1  
Pbr036954.1  
Pbr036427.1  
Pbr011185.2  
Pbr016218.1  
Pbr025627.1  
Pbr038308.1  
Pbr040696.1  
Pbr024266.1  
Pbr002511.1  
Pbr001038.1  
Pbr042830.1  
Pbr008435.1  
Pbr021685.1  
Pbr005226.1  
Pbr015770.1  
Pbr024043.1  
Pbr030694.1  
Pbr012460.1  
Pbr030620.2  
Pbr009752.1  
Pbr009796.1  
Pbr013726.1  
Pbr002686.1  
Pbr031478.1  
Pbr034258.1  
Pbr009832.1  
Pbr013433.1  
Pbr006106.1  
Pbr014489.2  
Pbr012513.2  
Pbr020669.1  
Pbr039168.1  
Pbr016643.1  
Pbr019138.1  
Pbr020882.1  
Pbr007512.1  
Pbr020118.1  
Pbr010162.1  
Pbr005668.1  
Pbr005959.1  
Pbr015578.1  
Pbr000881.1  
Pbr027582.2  
Pbr015458.1  
Pbr019971.1  
Pbr023571.1  
Pbr013421.1  
Pbr007515.1  
Pbr031707.2  
Pbr041503.2  
Pbr007516.1  
Pbr025277.1  
Pbr017683.1  
Pbr009692.1  
Pbr033697.1  
Pbr027978.1  
Pbr035117.1  
Pbr007940.1  
Pbr027389.1  
Pbr041485.1  
Pbr005121.1  
Pbr018953.1  
Pbr041476.1  
Pbr024598.1  
Pbr022114.2  
Pbr018995.1  
Pbr034720.1  
Pbr026715.1  
Pbr040389.1  
Pbr030013.1  
Pbr014292.1  
Pbr033957.1  
Pbr035052.1  
Pbr014767.2  
Pbr038283.1  
Pbr025412.1  
Pbr023485.1  
Pbr039028.1  
Pbr000742.1  
Pbr042836.1  
Pbr008930.3  
Pbr029177.1  
Pbr018948.1  
Pbr032758.1  
Pbr009875.1  
Pbr024381.1  
Pbr026491.1  
Pbr019871.1  
Pbr029723.1  
Pbr003013.1  
Pbr042041.2  
Pbr037725.1  
Pbr005466.2  
Pbr007194.1  
Pbr000340.1  
Pbr014084.1  
Pbr019320.1  
Pbr016974.1  
Pbr015994.2  
Pbr029962.1  
Pbr000966.1  
Pbr032913.1  
Pbr017881.1  
Pbr017051.1  
Pbr018992.1  
Pbr000392.1  
Pbr007555.1  
Pbr030167.1  
Pbr042627.1  
Pbr026159.1  
Pbr020635.1  
Pbr021975.1  
Pbr010184.2  
Pbr001268.1  
Pbr015553.1  
Pbr021490.1  
Pbr038622.1  
Pbr014742.1  
Pbr041061.1  
Pbr000858.1  
Pbr020357.1  
Pbr031293.1  
Pbr012943.1  
Pbr008948.1  
Pbr025016.1  
Pbr009689.2  
Pbr022928.1  
Pbr033715.1  
Pbr012246.1  
Pbr038123.1  
Pbr006420.1  
Pbr038683.3  
Pbr000964.1  
Pbr033734.1  
Pbr001985.1  
Pbr024390.1  
Pbr020436.1  
Pbr042643.1  
Pbr012685.1  
Pbr019191.1  
Pbr026937.1  
Pbr030125.1  
Pbr015686.1  
Pbr034558.2  
Pbr029781.1  
Pbr027542.1  
Pbr016755.1  
Pbr001987.1  
Pbr020654.1  
Pbr041187.1  
Pbr028962.1  
Pbr005626.1  
Pbr037652.1  
Pbr007577.1  
Pbr034785.1  
Pbr014790.1  
Pbr011343.1  
Pbr009485.1  
Pbr032487.1  
Pbr038878.1  
Pbr005806.2  
Pbr007413.1  
Pbr041173.1  
Pbr032825.1  
Pbr019182.1  
Pbr015226.1  
Pbr038837.1  
Pbr038344.1  
Pbr042884.1  
Pbr019632.1  
Pbr009418.1  
Pbr002342.1  
Pbr035245.1  
Pbr036218.1  
Pbr030659.1  
Pbr016007.1  
Pbr012274.3  
Pbr024987.1  
Pbr019821.1  
Pbr004282.1  
Pbr010124.2  
Pbr036716.1  
Pbr012012.1  
Pbr042269.1  
Pbr002040.1  
Pbr014300.1  
Pbr017827.1  
Pbr029676.1  
Pbr027146.1  
Pbr039736.1  
Pbr012758.1  
Pbr016780.1  
Pbr034251.1  
Pbr012286.1  
Pbr004855.1  
Pbr023138.1  
Pbr001944.1  
Pbr034383.2  
Pbr010367.1  
Pbr038305.1  
Pbr001557.1  
Pbr035830.1  
Pbr029572.1  
Pbr024336.1  
Pbr017163.1  
Pbr042015.1  
Pbr040670.2  
Pbr019437.1  
Pbr036124.2  
Pbr012288.1  
Pbr036330.1  
Pbr035698.1  
Pbr016958.1  
Pbr029276.1  
Pbr003147.1  
Pbr000498.1  
Pbr023144.1  
Pbr041882.1  
Pbr034983.1  
Pbr012262.1  
Pbr034197.1  
Pbr021322.1  
Pbr021705.2  
Pbr007919.1  
Pbr014661.1  
Pbr025778.1  
Pbr041310.1  
Pbr024056.2  
Pbr036619.1  
Pbr035337.1  
Pbr015253.1  
Pbr038060.1  
Pbr004165.1  
Pbr000860.1  
Pbr038280.1  
Pbr023540.3  
Pbr035713.1  
Pbr033315.1  
Pbr010506.1  
Pbr022066.1  
Pbr020650.1  
Pbr037405.1  
Pbr020648.1  
Pbr010509.1  
Pbr000320.1  
Pbr018852.1  
Pbr033034.1  
Pbr004683.1  
Pbr012939.1  
Pbr002421.1  
Pbr008091.1  
Pbr010657.1  
Pbr036580.1  
Pbr029731.1  
Pbr021699.1  
Pbr000765.1  
Pbr032242.1  
Pbr000364.1  
Pbr009296.1  
Pbr029677.1  
Pbr017803.1  
Pbr035919.1  
Pbr004477.1  
Pbr033323.1  
Pbr042662.1  
Pbr031224.1  
Pbr042748.1  
Pbr024967.2  
Pbr001955.1  
Pbr007400.1  
Pbr028004.1  
Pbr006946.1  
Pbr000552.2  
Pbr029733.1  
Pbr010563.1  
Pbr015383.1  
Pbr006724.1  
Pbr011927.1  
Pbr039810.1  
Pbr009864.1  
Pbr041770.1  
Pbr020413.1  
Pbr009717.1  
Pbr009411.1  
Pbr033545.1  
Pbr003117.1  
Pbr023944.1  
Pbr028546.1  
Pbr037695.1  
Pbr025728.1  
Pbr009412.1  
Pbr033547.1  
Pbr002660.1  
Pbr007203.1  
Pbr022454.1  
Pbr012855.1  
Pbr003847.1  
Pbr039425.1  
Pbr007241.1  
Pbr039415.1  
Pbr036171.1  
Pbr018793.1  
Pbr004527.1  
Pbr014379.1  
Pbr023186.1  
Pbr021983.1  
Pbr032240.1  
Pbr016383.1  
Pbr016025.1  
Pbr012328.1  
Pbr033544.1  
Pbr019989.1  
Pbr016276.2  
Pbr027149.1  
Pbr027684.3  
Pbr003361.1  
Pbr018158.1  
Pbr027681.1  
Pbr006182.1  
Pbr029514.1  
Pbr038836.1  
Pbr009509.1  
Pbr009514.1  
Pbr009174.2  
Pbr014131.1  
Pbr008255.1  
Pbr037483.1  
Pbr038330.1  
Pbr013230.1  
Pbr025556.1  
Pbr034492.1  
Pbr031319.1  
Pbr022175.1  
Pbr005404.2  
Pbr039178.2  
Pbr012665.1  
Pbr011318.1  
Pbr016246.1  
Pbr037072.1  
Pbr026210.1  
Pbr025171.1  
Pbr016461.1  
Pbr005938.1  
Pbr025304.1  
Pbr009055.1  
Pbr023404.1  
Pbr015173.1  
Pbr028159.1  
Pbr007105.1  
Pbr036768.1  
Pbr017405.1  
Pbr041459.1  
Pbr011093.1  
Pbr015701.1  
Pbr008421.1  
Pbr001410.1  
Pbr019345.1  
Pbr040628.2  
Pbr000581.1  
Pbr000081.1  
Pbr030682.1  
Pbr021831.1  
Pbr027510.1  
Pbr005697.1  
Pbr016784.1  
Pbr004930.1  
Pbr003696.1  
Pbr015496.1  
Pbr011481.1  
Pbr029306.1  
Pbr004774.1  
Pbr015607.1  
Pbr029013.1  
Pbr013226.1  
Pbr017408.1  
Pbr029260.1  
Pbr039189.1  
Pbr039474.1  
Pbr033184.1  
Pbr030669.1  
Pbr003445.1  
Pbr014773.1  
Pbr006876.1  
Pbr016294.1  
Pbr027426.2  
Pbr030074.1  
Pbr023688.1  
Pbr013718.1  
Pbr021883.1  
Pbr040222.1  
Pbr001866.1

-4.55  
-3.03  
-1.52  
0.00  
1.52  
3.03  
4.55
